# Supplementary material
Source: HighWire-hosted journal article supplement (https://www.cmajopen.ca/highwire/filestream/81289/field_highwire_adjunct_files/2/2019-0154-3-at.pdf)
Supplement: 2019-0154-3-at.pdf [file 2019-0154-3-at.pdf]

**Appendix 3 (as supplied by the authors): First presenting complaint data among women who had a peri-pregnancy emergency department (ED) visit occurring within pregnancy or up to 42 days thereafter.**

All data are presented as a number (%). The current list reflects 287,602 pregnancies between April 1 2010 and March 31 2018 in the era when the *presenting complaint* data were available in the National Ambulatory Care Reporting System (NACRS) database.

| <b>Presenting complaint</b>                          | <b>No. (%) as the first presenting complaint<sup>a</sup></b> |
|------------------------------------------------------|--------------------------------------------------------------|
| <b>Any pregnancy or postpartum issue<sup>b</sup></b> | <b>153,800 (27.1)</b>                                        |
| Other complaints <sup>c</sup>                        |                                                              |
| <i>Vaginal bleed</i>                                 | 64,229 (11.3)                                                |
| <i>Abdominal pain</i>                                | 58,350 (10.3)                                                |
| <i>Imaging tests</i>                                 | 34,243 (6.0)                                                 |
| <i>Unknown</i>                                       | 26,351 (4.6)                                                 |
| <i>Vomiting and/or nausea</i>                        | 21,561 (3.8)                                                 |
| <i>Postoperative complications</i>                   | 9835 (1.7)                                                   |
| <i>Headache</i>                                      | 9779 (1.7)                                                   |
| <i>Abnormal lab values</i>                           | 9328 (1.6)                                                   |
| <i>Cough/congestion</i>                              | 8728 (1.5)                                                   |
| <i>UTI complaints</i>                                | 7989 (1.4)                                                   |
| <i>Direct referral for consultation</i>              | 7979 (1.4)                                                   |
| <i>Minor complaints NOS</i>                          | 7606 (1.3)                                                   |
| <i>Shortness of breath</i>                           | 7457 (1.3)                                                   |
| <i>Back pain</i>                                     | 7127 (1.3)                                                   |
| <i>Fever</i>                                         | 6304 (1.1)                                                   |
| <i>Prescription/medication request</i>               | 6255 (1.1)                                                   |
| <i>Sore throat</i>                                   | 6013 (1.1)                                                   |
| <i>Lower extremity pain</i>                          | 4947 (0.9)                                                   |
| <i>Chest pain (noncardiac features)</i>              | 4569 (0.8)                                                   |
| <i>Lower extremity injury</i>                        | 4526 (0.8)                                                   |
| <i>Localized swelling/redness</i>                    | 4410 (0.8)                                                   |
| <i>Chest pain (cardiac features)</i>                 | 4372 (0.8)                                                   |
| <i>Flank pain</i>                                    | 4264 (0.8)                                                   |
| <i>syncope/presyncope</i>                            | 4067 (0.7)                                                   |
| <i>Wound check</i>                                   | 3857 (0.7)                                                   |
| <i>Rash</i>                                          | 3587 (0.6)                                                   |
| <i>Vertigo</i>                                       | 3317 (0.6)                                                   |
| <i>Earache</i>                                       | 3100 (0.6)                                                   |
| <i>Dental/gum problems</i>                           | 2933 (0.5)                                                   |
| <i>Diarrhea</i>                                      | 2876 (0.5)                                                   |
| <i>Upper extremity injury</i>                        | 2844 (0.5)                                                   |
| <i>Laceration/puncture</i>                           | 2637 (0.5)                                                   |
| <i>Depression/suicidal/deliberate self harm</i>      | 2617 (0.5)                                                   |

| <b>Presenting complaint</b>              | <b>No. (%) as the first presenting complaint<sup>a</sup></b> |
|------------------------------------------|--------------------------------------------------------------|
| <i>Anxiety/situational crisis</i>        | 2468 (0.4)                                                   |
| <i>Palpitations/irregular heart beat</i> | 2418 (0.4)                                                   |
| <i>Vaginal discharge</i>                 | 2382 (0.4)                                                   |
| <i>General weakness</i>                  | 2311 (0.4)                                                   |
| <i>Upper extremity pain</i>              | 2277 (0.4)                                                   |
| <i>Redness/tenderness breast</i>         | 2123 (0.4)                                                   |
| <i>Lumps bumps calluses</i>              | 2067 (0.4)                                                   |
| <i>Hypertension</i>                      | 1950 (0.3)                                                   |
| <i>Vaginal pain/itch</i>                 | 1844 (0.3)                                                   |
| <i>Allergic reaction</i>                 | 1767 (0.3)                                                   |
| <i>Rectal/perineal pain</i>              | 1674 (0.3)                                                   |
| <i>Head injury</i>                       | 1411 (0.3)                                                   |
| <i>Neck swelling/pain</i>                | 1294 (0.2)                                                   |
| <i>Constipation</i>                      | 1203 (0.2)                                                   |
| <i>Bilateral leg swelling/edema</i>      | 1133 (0.2)                                                   |
| <i>Sensory loss/parasthesias</i>         | 1023 (0.2)                                                   |
| <i>URTI complaints</i>                   | 1019 (0.2)                                                   |
| <i>Other skin conditions</i>             | 989 (0.2)                                                    |
| <i>Seizure</i>                           | 919 (0.2)                                                    |
| <i>Red eye discharge</i>                 | 910 (0.2)                                                    |
| <i>Blood in stool/melena</i>             | 899 (0.2)                                                    |
| <i>Bite</i>                              | 843 (0.2)                                                    |
| <i>Urinary retention</i>                 | 838 (0.2)                                                    |
| <i>All other complaints</i>              | 20,106 (3.5)                                                 |

<sup>a</sup>The total number of peri-pregnancy ED visits is greater than the 287,602 total number of pregnancies as more than one peri-pregnancy ED visit could occur within a given pregnancy.

<sup>b</sup>Comprises Canadian Emergency Department Information System (CEDIS) Presenting Complaint List for Use With NACRS (v.5.1): Code 457 (pregnancy issues < 20 weeks), code 458 (pregnancy issues > 20 weeks), or code 461 (postpartum issues).

<sup>c</sup>Comprises the remaining non-pregnancy CEDIS Presenting Complaint List for Use With NACRS (v.5.1).
